# Supplementary material for: Insights into Persistence Mechanisms of a Zoonotic Virus in Bat Colonies Using a Multispecies Metapopulation Model
Source: PubMed Central journal article supplement (PMC3995755; doi:10.1371/journal.pone.0095610), 2014-04-22

## Impact of a potentially long *Rhinolophus ferrumequinum* infectious period

To explore how a potentially long *R. ferrumequinum* infectious period could specifically impact our analysis of the roles of ecological factors and each bat species on EBLV-1 persistence on each island, we ran the same analysis now assuming a 50- or 100-day long *R. ferrumequinum* infectious period, instead of 10 days (see Figures S2 and S3).

Because *R. ferrumequinum* presence is greater on Menorca than on Mallorca, virus persistence differed between the islands for these new parameter values. On Menorca, the influence of interisland exchanges was quasi-null, with a clear threshold effect for the influence of contacts during the low-transmission period:  $r \leq 0.2$  yielded no persistence, whereas  $r \geq 0.6$  yielded maximum persistence. On Mallorca, the effect of contacts during the low-transmission period was also important, but above all, a threshold effect for persistence was seen when the number of individuals traveling between islands exceeded 1: thereafter, the number of individuals did not apparently further influence EBLV-1 persistence. Consequently, removing *R. ferrumequinum* infectious contacts slightly diminished virus persistence on both islands, reaching levels similar to those obtained for a short *R. ferrumequinum* infectious period. When *M. schreibersii* infectious contacts were removed, EBLV-1 persisted on Menorca because of *R. ferrumequinum* abundance, while on Mallorca, EBLV-1 persistence required seasonal exchanges with Menorca (winter contacts alone did not sustain virus persistence). These observations suggest that, should *R. ferrumequinum* have a longer-than-expected infectious period, *M. schreibersii* would no longer be the only essential species for EBLV-1 persistence in the system, and moreover, interisland exchanges could be an important factor for EBLV-1 persistence on Mallorca.

The average enzootic period duration was reassessed, now setting  $R_0$  at 3 and  $r$  at 0.6, with a *R. ferrumequinum* 100-day infectious period. As before, the *M. schreibersii* subpopulations had the longest enzootic periods in CB and CC. But, as expected, *R. ferrumequinum* had the longest enzootic period in CA, lasting on average the entire simulation time.

**Figure S2** Effect of ecological factors on EBLV-1 persistence when *R. ferrumequinum* has a long infectious period. The persistence index is represented as a function of the seasonal interisland exchanges ( $Y$ -axes) and reduction of contacts during low-transmission periods ( $X$ -axes), for three different  $R_0$  values (2, 4 and 6). Persistence index shades of gray from white to black correspond, respectively, to low and high probabilities of virus persistence.

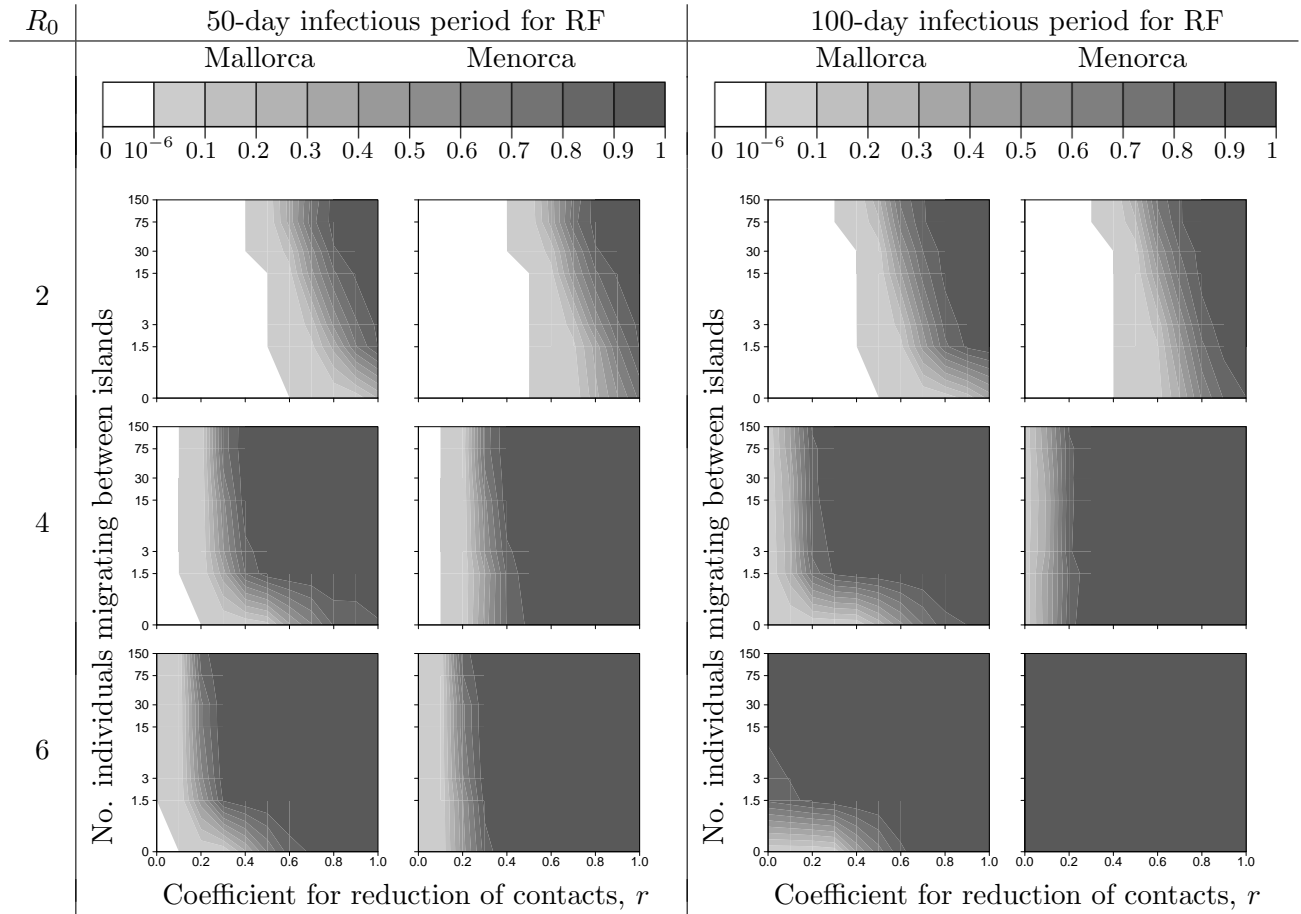

**Figure S3** Effect of the different bat species on EBLV-1 persistence when *R. ferrumequinum* has a long infectious period. The persistence index is represented as in Fig. S3. Abbreviations are as given in the legend to Table S3.

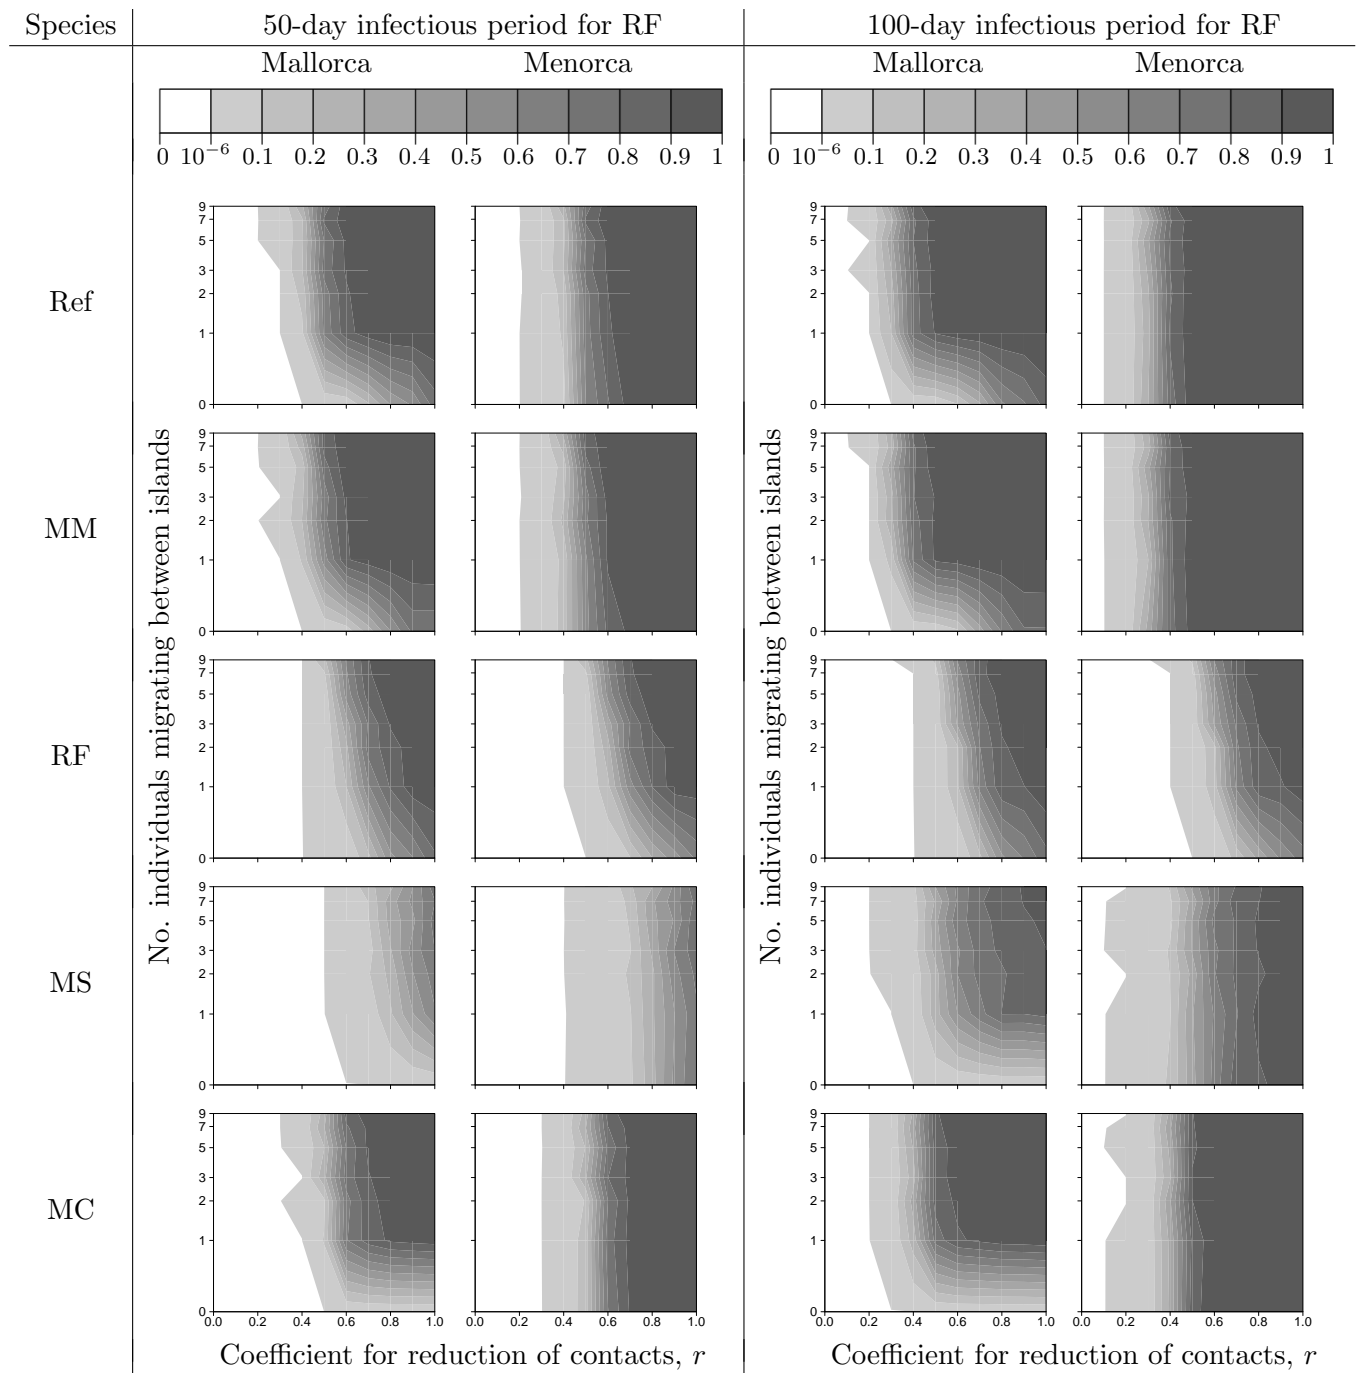

Supplement: pone.0095610.s002.pdf [file pone.0095610.s002.pdf]
