# Supplementary material for: Insights into Persistence Mechanisms of a Zoonotic Virus in Bat Colonies Using a Multispecies Metapopulation Model
Source: PubMed Central journal article supplement (PMC3995755; doi:10.1371/journal.pone.0095610), 2014-04-22

**Figure S1** Bat-species distributions. Pale beige indicates never observed, while red indicates observed.

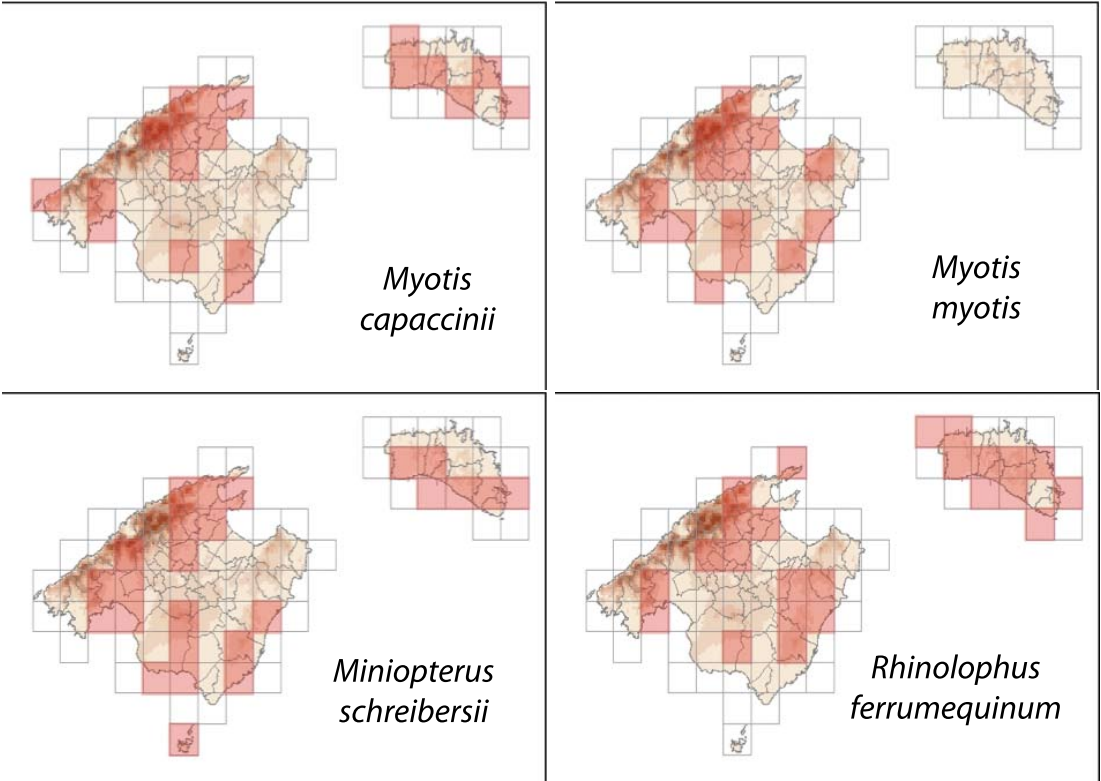

Supplement: pone.0095610.s001.pdf [file pone.0095610.s001.pdf]
